# Supplementary material
Source: publisher site journal article supplement (https://www.spandidos-publications.com/7293/downloadSupplementary)
Supplement: Supplementary file 1 [file downloadSupplementary]

## Sheet: Sheet1
Table S1. Primer sequence and plasmid sequence
Primer name	Forward (5’-3’)	Reverse (5’-3’)
ZNF667-AS1	GGGAGTGTCCGCCATAAAGT	AGATCGTAGCAGGGTCCAGT
GAPDH	GGGAGCCAAAAGGGTCAT	GAGTCCTTCCACGATACCAA
Plasmid name	Plasmid sequence
pCDH-CMV-ZNF667-AS1(human)-lncRNA-EF1a-CopGFP-T2A-Puro	acgcgtgtagtcttatgcaatactcttgtagtcttgcaacatggtaacgatgagttagcaacatgccttacaaggagagaaaaagcaccgtgcatgccgattggtggaagtaaggtggtacgatcgtgccttattaggaaggcaacagacgggtctgacatggattggacgaaccactgaattgccgcattgcagagatattgtatttaagtgcctagctcgatacaataaacgggtctctctggttagaccagatctgagcctgggagctctctggctaactagggaacccactgcttaagcctcaataaagcttgccttgagtgcttcaagtagtgtgtgcccgtctgttgtgtgactctggtaactagagatccctcagacccttttagtcagtgt…
pCDH-CMV-MCS-EF1-CopGFP-T2A-Puro	acgcgtgtagtcttatgcaatactcttgtagtcttgcaacatggtaacgatgagttagcaacatgccttacaaggagagaaaaagcaccgtgcatgccgattggtggaagtaaggtggtacgatcgtgccttattaggaaggcaacagacgggtctgacatggattggacgaaccactgaattgccgcattgcagagatattgtatttaagtgcctagctcgatacaataaacgggtctctctggttagaccagatctgagcctgggagctctctggctaactagggaacccactgcttaagcctcaataaagcttgccttgagtgcttcaagtagtgtgtgcccgtctgttgtgtgactctggtaactagagatccctcagacccttttagtcagtgt…
